# Supplementary material for: Describing variability in pig genes involved in coronavirus infections for a One Health perspective in conservation of animal genetic resources
Source: Springer Nature journal article supplement (doi:10.1038/s41598-021-82956-0), 2021-02-09
Supplement: MOESM1 [file 41598_2021_82956_MOESM1_ESM.pdf]

*Supplementary material*

**Describing variability in pig genes involved in coronavirus infections for a One Health perspective in conservation of animal genetic resources**

Samuele Bovo, Giuseppina Schiavo, Anisa Ribani, Valerio J. Utzeri, Valeria Taurisano, Mohamad Ballan, Maria Muñoz, Estefania Alves, Jose P. Araujo, Riccardo Bozzi, Rui Charneca, Federica Di Palma, Ivona Djurkin Kušec, Graham Etherington, Ana I. Fernandez, Fabián García, Juan García-Casco, Danijel Karolyi, Maurizio Gallo, José Manuel Martins, Marie-José Mercat, Yolanda Núñez, Raquel Quintanilla, Čedomir Radović, Violeta Razmaite, Juliette Riquet, Radomir Savić, Martin Škrlep, Graziano Usai, Christoph Zimmer, Cristina Ovilo, Luca Fontanesi

**Supplementary Table S1.** Details on the analyzed animals and investigated breeds.

| Breed name      | Acronym of the breed name | Native Name            | Alternative name                                                                                                                                                                                                                               | Country / Geographic region                                                                | Population                                                                            | Additional Info                                                                                                                                                                                                                                                                                                       |
|-----------------|---------------------------|------------------------|------------------------------------------------------------------------------------------------------------------------------------------------------------------------------------------------------------------------------------------------|--------------------------------------------------------------------------------------------|---------------------------------------------------------------------------------------|-----------------------------------------------------------------------------------------------------------------------------------------------------------------------------------------------------------------------------------------------------------------------------------------------------------------------|
| Alentejana      | AL                        | Alentejano, Alentejana | Alentejano                                                                                                                                                                                                                                     | PT / Southwest of the Iberian Peninsula                                                    | 6464 breeding sows and 510 boars distributed by 137 herds (End of 2017).              | <a href="https://www.intechopen.com/books/european-local-pig-breeds-diversity-and-performance-a-study-of-project-treasure/alentejano-pig">https://www.intechopen.com/books/european-local-pig-breeds-diversity-and-performance-a-study-of-project-treasure/alentejano-pig</a>                                         |
| Apulo-Calabrese | AC                        | Apulo Calabrese        | Apulo Calabrese, Calabrese, Nero Abruzzese, Nero Calabrese, Nero dei Lepini, Nero dei Monti Dauni Meridionali, Nero dei Monti Lepini, Nero di Calabria, Nero di Capitanata, Nero Lucano, Nero Maremmano, Nero Pugliese, Nero Reatino, Pugliese | IT / Central-South of Italy (Lazio, Basilicata and Calabria regions)                       | 489 breeding sows and 93 boars distributed in 45 registered farms (August 2015).      | <a href="https://www.intechopen.com/books/european-local-pig-breeds-diversity-and-performance-a-study-of-project-treasure/apulo-calabrese-pig">https://www.intechopen.com/books/european-local-pig-breeds-diversity-and-performance-a-study-of-project-treasure/apulo-calabrese-pig</a>                               |
| Basque          | BA                        | Basque                 | Basque Pie Noir du Pays Basque Bigourdan Béarnais Basco-Béarnais Navarrin                                                                                                                                                                      | FR / Basque Country, a region located in the South-West of France and across Spain border. | 580 breeding sows distributed in 28 registered farms (January 2017).                  | <a href="https://www.intechopen.com/books/european-local-pig-breeds-diversity-and-performance-a-study-of-project-treasure/basque-pig">https://www.intechopen.com/books/european-local-pig-breeds-diversity-and-performance-a-study-of-project-treasure/basque-pig</a>                                                 |
| Bísara          | BI                        | Bísaro, Bísara         | Bísaro                                                                                                                                                                                                                                         | PT / North of Portugal                                                                     | 5460 breeding sows and 520 boars distributed in 189 registered farms (August 2017)    | <a href="https://www.intechopen.com/books/european-local-pig-breeds-diversity-and-performance-a-study-of-project-treasure/b-saro-pig">https://www.intechopen.com/books/european-local-pig-breeds-diversity-and-performance-a-study-of-project-treasure/b-saro-pig</a>                                                 |
| Black Slavonian | BS                        | Black Slavonian        | Fajferica                                                                                                                                                                                                                                      | HR / East Croatia                                                                          | 1930 breeding sows and 242 boars distributed in 209 registered farms (December 2017). | <a href="https://www.intechopen.com/books/european-local-pig-breeds-diversity-and-performance-a-study-of-project-treasure/black-slavonian-crna-slavonska-pig">https://www.intechopen.com/books/european-local-pig-breeds-diversity-and-performance-a-study-of-project-treasure/black-slavonian-crna-slavonska-pig</a> |
| Casertana       | CA                        | Casertana              | Casertana, Maiale di Teano, Teanese, Pelatella                                                                                                                                                                                                 | IT / Central-South of Italy (Campania and Molise regions)                                  | 545 breeding sows and 20 boars distributed in 20 registered farms (August 2015).      | <a href="https://www.intechopen.com/books/european-local-pig-breeds-diversity-and-performance-a-study-of-project-treasure/nero-casertano-pig">https://www.intechopen.com/books/european-local-pig-breeds-diversity-and-performance-a-study-of-project-treasure/nero-casertano-pig</a>                                 |

|                               |      |                                |                                                                                            |                                                                        |                                                                                           |                                                                                                                                                                                                                                                                                                                                                         |
|-------------------------------|------|--------------------------------|--------------------------------------------------------------------------------------------|------------------------------------------------------------------------|-------------------------------------------------------------------------------------------|---------------------------------------------------------------------------------------------------------------------------------------------------------------------------------------------------------------------------------------------------------------------------------------------------------------------------------------------------------|
| Cinta Senese                  | CS   | Cinta Senese                   | Cinta Senese, Cinta, Cinto, Cinto Toscano, Cinturello Umbro, Cinturino Umbro, Siena Belted | IT / Central Italy (Tuscany region)                                    | 5000 animals distributed in 140 farms                                                     | <a href="https://www.intechopen.com/books/european-local-pig-breeds-diversity-and-performance-a-study-of-project-treasure/cinta-senese-pig">https://www.intechopen.com/books/european-local-pig-breeds-diversity-and-performance-a-study-of-project-treasure/cinta-senese-pig</a>                                                                       |
| Gascon                        | GA   | Gascon                         | Gascon                                                                                     | FR / Foot of the Pyrénées mountains in the southwest of France.        | 1423 breeding sows and 177 breeding males distributed in 64 registered farms (year 2017). | <a href="https://www.intechopen.com/books/european-local-pig-breeds-diversity-and-performance-a-study-of-project-treasure/gascon-pig">https://www.intechopen.com/books/european-local-pig-breeds-diversity-and-performance-a-study-of-project-treasure/gascon-pig</a>                                                                                   |
| Krškopolje                    | KR   | Krškopoljski prašič            | Krškopolje pig                                                                             | SI / Slovenia                                                          | 311 breeding sows and 60 boars distributed in 130 registered farms (August 2015).         | <a href="https://www.intechopen.com/books/european-local-pig-breeds-diversity-and-performance-a-study-of-project-treasure/kr-kopoljski-pra-i-kr-kopolje-pig-">https://www.intechopen.com/books/european-local-pig-breeds-diversity-and-performance-a-study-of-project-treasure/kr-kopoljski-pra-i-kr-kopolje-pig-</a>                                   |
| Lithuanian Indigenous Wattle  | LIW  | Lietuvos vietines              | Lithuanian indigenous wattle                                                               | LT / Central part of Lithuania, Baisogala, Radviliškis district        | 43 breeding sows and 11 boars distributed in 2 registered farms (December 2017)           | <a href="https://www.intechopen.com/books/european-local-pig-breeds-diversity-and-performance-a-study-of-project-treasure/lietuvos-vietin-lithuanian-indigenous-wattle-pig">https://www.intechopen.com/books/european-local-pig-breeds-diversity-and-performance-a-study-of-project-treasure/lietuvos-vietin-lithuanian-indigenous-wattle-pig</a>       |
| Lithuanian White Old Type     | LWOT | Senojo tipo Lietuvos baltosios | Old type Lithuanian White                                                                  | LT / Baisogala, Radviliškis district, in the central part of Lithuania | 93 breeding sows and 19 boars distributed in 3 registered farms (December 2017).          | <a href="https://www.intechopen.com/books/european-local-pig-breeds-diversity-and-performance-a-study-of-project-treasure/lietuvos-baltosios-senojo-tipo-lithuanian-white-pig">https://www.intechopen.com/books/european-local-pig-breeds-diversity-and-performance-a-study-of-project-treasure/lietuvos-baltosios-senojo-tipo-lithuanian-white-pig</a> |
| Majorcan Black                | MB   | Negre Mallorquí                | Black Majorcan Porc Negre Mallorquí Cerdo Negro Mallorquín                                 | ES / Balearic Islands                                                  | 969 breeding sows and 54 boars distributed in 59 registered farms (August, 2016).         | <a href="https://www.intechopen.com/books/european-local-pig-breeds-diversity-and-performance-a-study-of-project-treasure/negre-mallorqu-majorcan-black-pig">https://www.intechopen.com/books/european-local-pig-breeds-diversity-and-performance-a-study-of-project-treasure/negre-mallorqu-majorcan-black-pig</a>                                     |
| Mora Romagnola                | MR   | Mora Romagnola                 | Mora Romagnola                                                                             | IT / North of Italy (Romagna region)                                   | 270 breeding sows and 67 boars distributed in the 31 registered farms (August 2015).      | <a href="https://www.intechopen.com/books/european-local-pig-breeds-diversity-and-performance-a-study-of-project-treasure/mora-romagnola-pig">https://www.intechopen.com/books/european-local-pig-breeds-diversity-and-performance-a-study-of-project-treasure/mora-romagnola-pig</a>                                                                   |
| Moravka                       | MO   | Moravka                        | Moravka                                                                                    | RS / Morava Valley of central Serbia                                   | 265 breeding sows and 15 boars distributed in 25 registered farms (February 2018).        | <a href="https://www.intechopen.com/books/european-local-pig-breeds-diversity-and-performance-a-study-of-project-treasure/moravka-pig">https://www.intechopen.com/books/european-local-pig-breeds-diversity-and-performance-a-study-of-project-treasure/moravka-pig</a>                                                                                 |
| Nero Siciliano                | NS   | Nero Siciliano                 | Nero dei Nebrodi, Nero delle Madonie, Nero dell'Etna                                       | IT / Sicily island                                                     | 1103 breeding sows and 124 boars distributed in 87 registered farms (August 2015).        | <a href="https://www.intechopen.com/books/european-local-pig-breeds-diversity-and-performance-a-study-of-project-treasure/nero-siciliano-pig">https://www.intechopen.com/books/european-local-pig-breeds-diversity-and-performance-a-study-of-project-treasure/nero-siciliano-pig</a>                                                                   |
| Sarda                         | SA   | Sarda                          | Sarda                                                                                      | IT / Sardinia island                                                   | 61 breeding sows and 20 boars distributed in 13 registered farms.                         | <a href="https://www.intechopen.com/books/european-local-pig-breeds-diversity-and-performance-a-study-of-project-treasure/sarda-pig">https://www.intechopen.com/books/european-local-pig-breeds-diversity-and-performance-a-study-of-project-treasure/sarda-pig</a>                                                                                     |
| Schwäbisch-Hällisches Schwein | SHS  | Schwäbisch-Hällisches Schwein  | Schwaebisch-Haellisches Schwein Swabian Hall pig, Swabian Hall swine                       | DE / Area of Schwäbisch Hall                                           | 350 breeding sows and 35 boars distributed in 15 registered farms (August 2015).          | <a href="https://www.intechopen.com/books/european-local-pig-breeds-diversity-and-performance-a-study-of-project-treasure/schw-bisch-h-llisches-pig">https://www.intechopen.com/books/european-local-pig-breeds-diversity-and-performance-a-study-of-project-treasure/schw-bisch-h-llisches-pig</a>                                                     |

|                            |      |                      |                      |                   |                                                                                  |                                                                                                                                                                                                                                                                                                                                 |
|----------------------------|------|----------------------|----------------------|-------------------|----------------------------------------------------------------------------------|---------------------------------------------------------------------------------------------------------------------------------------------------------------------------------------------------------------------------------------------------------------------------------------------------------------------------------|
| Swallow-Bellied Mangalitsa | SBMA | Mangulica            | Mangalitsa           | RS / Serbia       | 925 sows, 605 gilts and 42 boars distributed in 67 registered farm (End of 2017) | <a href="https://www.intechopen.com/books/european-local-pig-breeds-diversity-and-performance-a-study-of-project-treasure/mangalitsa-swallow-belly-mangalitsa-pig">https://www.intechopen.com/books/european-local-pig-breeds-diversity-and-performance-a-study-of-project-treasure/mangalitsa-swallow-belly-mangalitsa-pig</a> |
| Turopolje                  | TU   | Turopoljska svinja   | Turopolje pig        | HR / West Croatia | 116 breeding sows and 14 boars distributed in 12 registered farms (August 2016). | <a href="https://www.intechopen.com/books/european-local-pig-breeds-diversity-and-performance-a-study-of-project-treasure/turopolje-pig-turopoljska-svinja-">https://www.intechopen.com/books/european-local-pig-breeds-diversity-and-performance-a-study-of-project-treasure/turopolje-pig-turopoljska-svinja-</a>             |
| Italian Duroc              | IDU  | Duroc Italiana       | Duroc Italiana       | IT                | -                                                                                | <a href="http://www.anas.it">www.anas.it</a>                                                                                                                                                                                                                                                                                    |
| Italian Large White        | ILW  | Large White Italiana | Large White Italiana | IT                | -                                                                                | <a href="http://www.anas.it">www.anas.it</a>                                                                                                                                                                                                                                                                                    |
| Italian Landrace           | ILA  | Landrace Italiana    | Landrace Italiana    | IT                | -                                                                                | <a href="http://www.anas.it">www.anas.it</a>                                                                                                                                                                                                                                                                                    |
| Wild Boar                  | WB   | Wild Boar            | Wild Boar            | IT                | -                                                                                | -                                                                                                                                                                                                                                                                                                                               |

**Supplementary Table S2.** Summary statistics of whole-genome resequencing data.

| <b>Breed</b>                  | <b>Country</b> | <b>No. of read pairs</b> | <b>No. of animals</b> | <b>Breadth of coverage (%)</b> | <b>Depth of coverage (×)</b> |
|-------------------------------|----------------|--------------------------|-----------------------|--------------------------------|------------------------------|
| <b>Autochthonous (Europe)</b> |                |                          |                       |                                |                              |
| Alentejana                    | PT             | 419,690,476              | 35                    | 98.42                          | 41.98                        |
| Apulo-Calabrese               | IT             | 418,529,727              | 35                    | 98.49                          | 42.12                        |
| Basque                        | FR             | 407,698,128              | 30                    | 98.35                          | 39.55                        |
| Bísara                        | PT             | 415,284,437              | 35                    | 98.51                          | 42.44                        |
| Black Slavonian               | HR             | 405,316,112              | 35                    | 98.51                          | 40.61                        |
| Casertana                     | IT             | 435,598,516              | 35                    | 98.50                          | 43.61                        |
| Cinta Senese                  | IT             | 422,120,850              | 35                    | 98.47                          | 42.42                        |
| Gascon                        | FR             | 408,764,207              | 30                    | 98.47                          | 41.10                        |
| Krškopolje                    | SI             | 404,204,144              | 35                    | 98.52                          | 40.80                        |
| Lithuanian Indigenous Wattle  | LT             | 409,935,460              | 35                    | 98.48                          | 41.99                        |
| Lithuanian White Old Type     | LT             | 405,822,217              | 35                    | 98.45                          | 41.62                        |
| Majorcan Black                | ES             | 414,314,159              | 35                    | 98.48                          | 41.92                        |
| Mora Romagnola                | IT             | 411,095,541              | 35                    | 98.45                          | 41.21                        |
| Moravka                       | RS             | 413,100,992              | 35                    | 98.49                          | 42.27                        |
| Nero Siciliano                | IT             | 405,812,223              | 35                    | 98.44                          | 38.92                        |
| Sarda                         | IT             | 442,035,147              | 35                    | 98.51                          | 44.32                        |
| Schwäbisch-Hällisches Schwein | DE             | 428,982,876              | 35                    | 98.48                          | 42.69                        |
| Swallow-Bellied Mangalitsa    | RS             | 416,663,891              | 35                    | 98.45                          | 41.08                        |
| Turopolje                     | HR             | 416,663,891              | 35                    | 98.36                          | 42.61                        |
| <b>Commercial (Europe)</b>    |                |                          |                       |                                |                              |
| Italian Duroc                 | IT             | 420,384,723              | 35                    | 98.51                          | 41.91                        |
| Italian Large White           | IT             | 450,673,024              | 35                    | 98.38                          | 45.24                        |
| Italian Landrace              | IT             | 442,780,637              | 35                    | 98.48                          | 44.35                        |
| <b>Wild Boar (Europe)</b>     | IT             | 164,203,815              | 35                    | 98.20                          | 11.74                        |
| Meishan (Asia)                | Asia           | 153,384,747              | 1                     | 97.86                          | 12.16                        |
| Meishan (Asia)                | Asia           | 159,324,510              | 1                     | 97.95                          | 12.54                        |
| Meishan (Asia)                | Asia           | 154,524,714              | 1                     | 97.20                          | 11.92                        |
| Meishan (Asia)                | Asia           | 118,665,143              | 1                     | 97.65                          | 9.35                         |
| Meishan (Asia)                | Asia           | 161,517,220              | 1                     | 97.92                          | 12.72                        |
| <b>Wild Boar (Asia)</b>       | Asia           | 196,283,001              | 1                     | 98.12                          | 15.02                        |
| <b>Wild Boar (Asia)</b>       | Asia           | 84,751,336               | 1                     | 92.31                          | 6.75                         |

**Supplementary Table S3.** Number of variants in candidate genes discovered in the analysis of European pig breeds.

| Gene*          | Variant type |        | Variant location <sup>§</sup> |        |      |        |        |                   |               | Variant consequence |          |            |   |
|----------------|--------------|--------|-------------------------------|--------|------|--------|--------|-------------------|---------------|---------------------|----------|------------|---|
|                | SNPs         | INDELS | Flanking (3'-UTR)             | 3'-UTR | Exon | Intron | 5'-UTR | Flanking (5'-UTR) | Splice region | Synonymous          | Missense | Frameshift |   |
| <i>ACE2</i>    | 750          | 87     | Novel                         | 14     | 0    | 2      | 374    | 0                 | 71            | 2                   | 1        | 1          | 0 |
|                |              |        | dbSNP                         | 33     | 2    | 21     | 428    | 0                 | 0             | 3                   | 11       | 10         | 0 |
|                |              |        | <b>Total</b>                  | 47     | 2    | 23     | 802    | 0                 | 71            | 5                   | 12       | 11         | 0 |
| <i>ANPEP</i>   | 161          | 12     | Novel                         | 6      | 0    | 0      | 11     | 0                 | 3             | 0                   | 0        | 0          | 0 |
|                |              |        | dbSNP                         | 25     | 4    | 7      | 98     | 1                 | 35            | 1                   | 3        | 4          | 0 |
|                |              |        | <b>Total</b>                  | 31     | 4    | 7      | 109    | 1                 | 38            | 1                   | 3        | 4          | 0 |
| <i>DPP4</i>    | 401          | 59     | Novel                         | 5      | 0    | 3      | 53     | 1                 | 3             | 0                   | 2        | 1          | 0 |
|                |              |        | dbSNP                         | 21     | 5    | 3      | 344    | 4                 | 18            | 1                   | 2        | 1          | 0 |
|                |              |        | <b>Total</b>                  | 26     | 5    | 6      | 397    | 5                 | 21            | 1                   | 4        | 2          | 0 |
| <i>TMPRSS2</i> | 687          | 72     | Novel                         | 7      | 3    | 0      | 54     | 0                 | 6             | 0                   | 0        | 0          | 1 |
|                |              |        | dbSNP                         | 91     | 19   | 18     | 474    | 0                 | 87            | 3                   | 11       | 5          | 0 |
|                |              |        | <b>Total</b>                  | 98     | 22   | 18     | 526    | 0                 | 93            | 3                   | 11       | 5          | 1 |

\* The identifier of the canonical transcript and gene coordinates are reported in Table 1. Data consider also additional flanking regions of 5 kbp.

§ The total sum is not equal to the no. of called variants (variant type) as they can co-locate or have multiple consequences as predicted with VEP.

## Supplementary Table S4. ACE2 residues critical for protein function and coronaviruses

pathogenesis.

| Interaction sites <sup>1</sup>               |                                                                                                                                                                                                                |
|----------------------------------------------|----------------------------------------------------------------------------------------------------------------------------------------------------------------------------------------------------------------|
| HSA*                                         | S19 Q24 A25 K26 T27 F28 D30 K31 H34 E35 E37 D38 Y41 Q42 L45 K68 L79 M82 Y83 N90 Q325 E329 N330 N339 K353 G354 D355 R357 M383 P389 R393 S425 P426 D427 R559                                                     |
| SSC <sup>^</sup>                             | . L24 . . F27 . E30 . L34 . . . . I79 T82 T90 N329 . . . . . P425 . . S559                                                                                                                                     |
| NGS <sup>§</sup>                             | . . . . . F83 . . . . .                                                                                                                                                                                        |
| Binding/Active sites <sup>2</sup>            |                                                                                                                                                                                                                |
|                                              | Binding site<br>Binding site<br>Binding site<br>Binding site<br>Binding site<br>Metal binding<br>Active site<br>Metal binding<br>Metal binding<br>Binding site<br>Binding site<br>Binding site<br>Binding site |
| HSA                                          | R169 R273 H345 P346 T371 H374 E375 H378 E402 W477 K481 H505 Y515                                                                                                                                               |
| SSC                                          | . . . . .                                                                                                                                                                                                      |
| NGS                                          | . . . . .                                                                                                                                                                                                      |
| Cleavage by ADAM17 <sup>2</sup>              |                                                                                                                                                                                                                |
| HSA                                          | R652 Q653 Y654 655F L656 K657 V658 K659                                                                                                                                                                        |
| SSC                                          | . N653 . . S656 S657 A658 .                                                                                                                                                                                    |
| NGS                                          | . . . . N657 R657 . .                                                                                                                                                                                          |
| Cleavage by TMPRSS1 and TMPRSS2 <sup>2</sup> |                                                                                                                                                                                                                |
| HSA                                          | R697 T698 E699 V700 E701 K702 A703 I704 R705 M706 S707 R708 S709 R710 I711 N712 D713 A714 F715 R716                                                                                                            |
| SSC                                          | . S698 D699 . . . . S705 . . . . .                                                                                                                                                                             |
| NGS                                          | . . . . . E702 . . . . . H716                                                                                                                                                                                  |
| Glycosylation sites <sup>3</sup>             |                                                                                                                                                                                                                |
| HSA                                          | N53 N90 N103 N322 N432 N546                                                                                                                                                                                    |
| SSC                                          | . T90 S103 . . .                                                                                                                                                                                               |
| NGS                                          | . . . . .                                                                                                                                                                                                      |

\* Residues are based on the human UniProtKB entry Q9BYF1.

<sup>^</sup> Residues are based on the porcine UniProtKB entry K7GLM4. A dot represents an identical residue where residues differing between human and pig are reported.

<sup>§</sup> Variants identified in the next generation sequencing datasets. Residues are reported. A dot represents an identical residue.

<sup>1</sup> UniProtKB annotations, Lan et al. (2020), Shang et al. (2020), Benetti et al. (2020), Sun et al. (2020), Damas et al. (2020), Li W et al. (2005), Li F et al (2005), Luan et al. (2020), Cao et al. (2020)

<sup>2</sup> UniProtKB annotations, Towler et al. (2004)

<sup>3</sup> UniProtKB annotations, Towler et al. (2004), Sun et al. (2020), Kristiansen et al. (2004), Chen et al. (2009).

## Supplementary Table S5. ANPEP residues critical for protein function and coronaviruses

pathogenesis. Residues differing between human and pig are underlined.

| Interaction sites <sup>1</sup>    |                                                                                                    |
|-----------------------------------|----------------------------------------------------------------------------------------------------|
| HSA*                              | D288 Y289 V290 E291 K292 Q293 A294 S295 D315 L318                                                  |
| SSC <sup>^</sup>                  | <u>Q283</u> <u>S284</u> V285 <u>N286</u> <u>E287</u> <u>T288</u> A289 <u>Q290</u> <u>M310</u> L313 |
| NGS <sup>§</sup>                  | . . . . .                                                                                          |
| Binding/Active sites <sup>2</sup> |                                                                                                    |
| HSA                               | H388 Metal binding<br>E389 Active site<br>H392 Metal binding<br>E411 Metal binding<br>Y477 Site    |
| SSC                               | H383<br>E384<br>H387<br>E406<br>Y472                                                               |
| NGS                               | . . . . .                                                                                          |
| Glycosylation sites <sup>3</sup>  |                                                                                                    |
| HSA                               | N128 N234 N265 N319 N527 N573 N625 N681 N818                                                       |
| SSC                               | N124 N229 <u>S260</u> N314 <u>D521</u> N569 N622 N676 <u>Q869</u>                                  |
| NGS                               | . . . . .                                                                                          |

\* Residues are based on the human UniProtKB entry P15144.

<sup>^</sup> Residues are based on the porcine UniProtKB entry A0A5G2QI26. Residues differing between human and pig are underlined.

<sup>§</sup> Variants identified in the next generation sequencing datasets. Residues are reported. A dot represents an identical residue.

<sup>1</sup> UniProtKB annotations, Li Z et al. (2019), Wentworth et al. (2019).

<sup>2</sup> UniProtKB annotations, Wong A et al. (2012), Kolb et al. (1996).

<sup>3</sup> UniProtKB annotations, Wentworth et al. (2019), Wong et al. (2012).



## Supplementary Table S6. DPP4 residues critical for protein function and coronaviruses

pathogenesis. Residues differing between human and pig are underlined.

| Interaction sites <sup>1</sup>   |             |             |      |             |             |             |      |             |      |             |             |      |      |      |             |
|----------------------------------|-------------|-------------|------|-------------|-------------|-------------|------|-------------|------|-------------|-------------|------|------|------|-------------|
| HSA*                             | <u>L267</u> | <u>P269</u> | Q286 | <u>I288</u> | <u>A289</u> | A291        | L294 | I295        | H298 | <u>A317</u> | <u>T322</u> | R336 | Q344 | I346 | <u>L392</u> |
| SSC <sup>^</sup>                 | <u>K334</u> | <u>F336</u> | Q353 | <u>V355</u> | <u>P356</u> | A358        | L361 | I362        | H365 | <u>R384</u> | <u>Y389</u> | R403 | Q411 | I413 | <u>S459</u> |
| NGS <sup>§</sup>                 | .           | .           | .    | .           | .           | .           | .    | .           | .    | .           | .           | .    | .    | .    | .           |
| Active sites <sup>2</sup>        |             |             |      |             |             |             |      |             |      |             |             |      |      |      |             |
| HSA                              | E205        | E206        | Y547 | S630        | D708        | H740        |      |             |      |             |             |      |      |      |             |
| SSC                              | E272        | E273        | Y614 | S697        | D775        | H807        |      |             |      |             |             |      |      |      |             |
| NGS                              | .           | .           | .    | .           | .           | .           |      |             |      |             |             |      |      |      |             |
| Glycosylation sites <sup>3</sup> |             |             |      |             |             |             |      |             |      |             |             |      |      |      |             |
| HSA                              | N85         | N92         | N150 | N219        | N229        | <u>N281</u> | N321 | <u>N520</u> | N685 |             |             |      |      |      |             |
| SSC                              | N152        | N159        | N217 | N286        | N296        | <u>S348</u> | N388 | <u>H587</u> | N752 |             |             |      |      |      |             |
| NGS                              | .           | .           | .    | .           | .           | .           | .    | .           | .    |             |             |      |      |      |             |

\*Residues are based on the human UniProtKB entry P27487.

<sup>^</sup> Residues are based on the porcine UniProtKB entry A0A5G2Q7G7. Residues differing between human and pig are underlined.

<sup>§</sup> Variants identified in the next generation sequencing datasets. Residues are reported. A dot represents an identical residue.

<sup>1</sup> UniProtKB annotations, Wang N et al. (2013), de Wit et al. (2017).

<sup>2</sup> UniProtKB annotations, Kirby et al. (2010).

<sup>3</sup> UniProtKB annotations, Hiramatsu et al. (2003), Rasmussen et al. (2003), Thoma et al. (2003), Meng et al. (2010), Chen R et al. (2009).

**Supplementary Table S7.** TMPRSS2 residues critical for protein function and coronavirus pathogenesis.

|                  | Cleavage/Binding/Active sites <sup>1</sup> |             |             |             |                   |             |                   |                   |
|------------------|--------------------------------------------|-------------|-------------|-------------|-------------------|-------------|-------------------|-------------------|
|                  | Cleavage                                   | Cleavage    | Active site | Active site | substrate binding | Active site | substrate binding | substrate binding |
| HSA*             | R255                                       | I256        | H296        | I346        | D435              | S441        | S460              | G462              |
| SSC <sup>^</sup> | R257                                       | I258        | H298        | I345        | D434              | S440        | S459              | G461              |
| NGS <sup>§</sup> | .                                          | <u>V258</u> | .           | .           | .                 | .           | .                 | .                 |

\* Residues are based on the human UniProtKB entry O15393.

<sup>^</sup> Residues are based on the porcine UniProtKB entry A0A287AFA0. Residues differing between human and pig are underlined.

<sup>§</sup> Variants identified in the next generation sequencing datasets. Residues are reported. A dot represents an identical residue.

<sup>1</sup> Hussain et al. (2020), Afar et al. (2001), Benetti et al. (2020).



|                |    |           |      |             |        |      |      |      |      |      |      |      |      |      |      |      |      |      |      |      |      |      |      |      |      |      |      |      |    |    |    |    |    |    |    |
|----------------|----|-----------|------|-------------|--------|------|------|------|------|------|------|------|------|------|------|------|------|------|------|------|------|------|------|------|------|------|------|------|----|----|----|----|----|----|----|
| <i>TMPRSS2</i> | 13 | 204881920 | G/GT | -           | A309SX | 0.28 | 0.41 | 0.75 | 0.47 | 0.29 | 0.27 | 0.40 | 0.78 | 0.74 | 0.15 | 0.08 | 0.57 | 0.00 | 0.19 | 0.47 | 0.20 | 0.35 | 0.61 | 0.87 | 0.64 | 0.12 | 0.43 | 0.30 | C  | C  | C  | C  | C  | C  | NC |
| <i>TMPRSS2</i> | 13 | 204883347 | T/C  | rs699066732 | I258V  | 0.00 | 0.00 | 0.00 | 0.00 | 0.00 | 0.00 | 0.11 | 0.00 | 0.00 | 0.21 | 0.00 | 0.15 | 0.00 | 0.00 | 0.00 | 0.13 | 0.00 | 0.00 | 0.00 | 0.07 | 0.00 | 0.00 | 0.00 | NC | NC | NC | NC | NC | NC | NC |
| <i>TMPRSS2</i> | 13 | 204887942 | A/T  | rs703753915 | F195I  | 0.00 | 0.00 | 0.00 | 0.00 | 0.00 | 0.00 | 0.00 | 0.00 | 0.00 | 0.00 | 0.00 | 0.00 | 0.00 | 0.00 | 0.00 | 0.10 | 0.00 | 0.00 | 0.14 | 0.00 | 0.00 | 0.00 | 0.00 | NC | NC | NC | NC | NC | NC | NC |

\* Acronyms of the breed name are given in Supplementary Table S1.

§ *ME* indicates Meishan pigs. *C* and *NC* indicate carries and non-carries of the variant.

**Supplementary Table S9.** All functional coding variants in the porcine *ACE2*, *ANPEP*, *DPP4* and *TMPRSS2* genes detected by mining whole genome resequencing datasets and retrieved from Ensembl, release 100.

| Location <sup>1</sup> | Alleles | Variant ID  | Gene         | Transcript           | Consequence      | Residue | SIFT                         | SIFT score | NGS |
|-----------------------|---------|-------------|--------------|----------------------|------------------|---------|------------------------------|------------|-----|
| X:12103359            | G/A     | rs713862336 | <i>ACE2</i>  | ENSSSCT00000034032.2 | missense variant | P738L   | deleterious - low confidence | 0.04       | YES |
| X:12103425            | C/T     | rs323807708 | <i>ACE2</i>  | ENSSSCT00000034032.2 | missense variant | R716H   | tolerated - low confidence   | 0.08       | YES |
| X:12105547            | T/C     | rs322684836 | <i>ACE2</i>  | ENSSSCT00000034032.2 | missense variant | K702E   | tolerated - low confidence   | 1.00       | YES |
| X:12107234            | G/A     | rs696938608 | <i>ACE2</i>  | ENSSSCT00000034032.2 | missense variant | A658V   | tolerated - low confidence   | 1.00       | YES |
| X:12107236            | A/T     | rs703692808 | <i>ACE2</i>  | ENSSSCT00000034032.2 | missense variant | S657R   | tolerated - low confidence   | 0.10       | YES |
| X:12107237            | C/T     | rs713746699 | <i>ACE2</i>  | ENSSSCT00000034032.2 | missense variant | S657N   | tolerated - low confidence   | 0.09       | YES |
| X:12107248            | A/C     | rs345377857 | <i>ACE2</i>  | ENSSSCT00000034032.2 | missense variant | N653K   | tolerated - low confidence   | 1.00       | YES |
| X:12109953            | T/A     | rs321042645 | <i>ACE2</i>  | ENSSSCT00000034032.2 | missense variant | E631D   | tolerated                    | 0.52       | YES |
| X:12109958            | T/C     | rs328679136 | <i>ACE2</i>  | ENSSSCT00000034032.2 | missense variant | K630E   | tolerated                    | 0.40       | YES |
| X:12120704            | T/C     | rs334297294 | <i>ACE2</i>  | ENSSSCT00000034032.2 | missense variant | I305V   | tolerated                    | 0.27       | YES |
| X:12136848            | T/A     | -           | <i>ACE2</i>  | -                    | missense variant | Y83F    | tolerated                    | 1.00       | YES |
| 7:55351535            | C/G     | rs321552301 | <i>ANPEP</i> | ENSSSCT00000086218.1 | missense variant | E1015Q  | tolerated                    | 0.21       | NO  |
| 7:55351584            | G/T     | rs702354052 | <i>ANPEP</i> | ENSSSCT00000086218.1 | missense variant | N998K   | deleterious                  | 0.01       | NO  |
| 7:55351589            | C/T     | rs80819730  | <i>ANPEP</i> | ENSSSCT00000086218.1 | missense variant | A997T   | tolerated                    | 0.17       | NO  |
| 7:55352761            | A/G     | rs80840529  | <i>ANPEP</i> | ENSSSCT00000086218.1 | missense variant | L904P   | tolerated                    | 0.20       | NO  |
| 7:55352771            | T/G     | rs690295979 | <i>ANPEP</i> | ENSSSCT00000086218.1 | missense variant | N901H   | deleterious                  | 0.01       | NO  |
| 7:55359943            | A/G     | rs694785744 | <i>ANPEP</i> | ENSSSCT00000086218.1 | missense variant | L701P   | tolerated                    | 0.31       | NO  |
| 7:55359949            | G/A     | rs704508162 | <i>ANPEP</i> | ENSSSCT00000086218.1 | missense variant | T699I   | tolerated                    | 0.07       | NO  |
| 7:55359973            | C/T     | rs708356135 | <i>ANPEP</i> | ENSSSCT00000086218.1 | missense variant | R691K   | tolerated                    | 0.50       | NO  |
| 7:55359983            | C/T     | rs694071064 | <i>ANPEP</i> | ENSSSCT00000086218.1 | missense variant | D688N   | tolerated                    | 0.46       | NO  |
| 7:55359986            | C/T     | rs790254658 | <i>ANPEP</i> | ENSSSCT00000086218.1 | missense variant | E687K   | tolerated                    | 0.83       | NO  |
| 7:55360022            | T/C     | rs322932309 | <i>ANPEP</i> | ENSSSCT00000086218.1 | missense variant | I675V   | tolerated                    | 0.50       | YES |
| 7:55360093            | C/T     | rs332460794 | <i>ANPEP</i> | ENSSSCT00000086218.1 | missense variant | R651Q   | tolerated                    | 0.47       | YES |
| 7:55360105            | G/A     | rs696362099 | <i>ANPEP</i> | ENSSSCT00000086218.1 | missense variant | A647V   | tolerated                    | 0.29       | NO  |
| 7:55360111            | A/G     | rs703234834 | <i>ANPEP</i> | ENSSSCT00000086218.1 | missense variant | F645S   | tolerated                    | 0.07       | NO  |
| 7:55360118            | T/C     | rs712865931 | <i>ANPEP</i> | ENSSSCT00000086218.1 | missense variant | M643V   | tolerated                    | 0.51       | NO  |
| 7:55360246            | T/C     | rs705719244 | <i>ANPEP</i> | ENSSSCT00000086218.1 | missense variant | D600G   | tolerated                    | 0.38       | NO  |
| 7:55360249            | C/T     | rs691486822 | <i>ANPEP</i> | ENSSSCT00000086218.1 | missense variant | R599Q   | tolerated                    | 0.59       | NO  |
| 7:55360253            | G/T     | rs698244278 | <i>ANPEP</i> | ENSSSCT00000086218.1 | missense variant | L598M   | tolerated                    | 0.23       | NO  |
| 7:55360585            | C/T     | rs698986521 | <i>ANPEP</i> | ENSSSCT00000086218.1 | missense variant | E567K   | tolerated                    | 0.20       | NO  |
| 7:55363723            | C/G     | rs695736506 | <i>ANPEP</i> | ENSSSCT00000086218.1 | missense variant | E359D   | deleterious                  | -          | YES |
| 7:55363906            | G/A     | rs331380848 | <i>ANPEP</i> | ENSSSCT00000086218.1 | missense variant | P330S   | tolerated                    | 1.00       | YES |
| 7:55364439            | A/G     | rs708466949 | <i>ANPEP</i> | ENSSSCT00000086218.1 | missense variant | V293A   | deleterious                  | 0.01       | NO  |

|              |      |             |         |                      |                       |         |                              |      |     |
|--------------|------|-------------|---------|----------------------|-----------------------|---------|------------------------------|------|-----|
| 7:55365462   | G/A  | rs323965258 | ANPEP   | ENSSSCT00000086218.1 | missense variant      | S164L   | tolerated                    | 0.27 | YES |
| 7:55365547   | C/T  | rs711934067 | ANPEP   | ENSSSCT00000086218.1 | missense variant      | G136S   | tolerated                    | 0.27 | NO  |
| 7:55365619   | G/A  | rs334494411 | ANPEP   | ENSSSCT00000086218.1 | missense variant      | P112S   | tolerated                    | 0.66 | YES |
| 7:55365631   | G/T  | rs431825257 | ANPEP   | ENSSSCT00000086218.1 | frameshift variant    | FI107FX | -                            | -    | NO  |
| 7:55365631   | G/T  | rs431825257 | ANPEP   | ENSSSCT00000086218.1 | frameshift variant    | FI107LX | -                            | -    | NO  |
| 7:55365858   | A/G  | rs342665405 | ANPEP   | ENSSSCT00000086218.1 | missense variant      | V32A    | tolerated                    | 0.09 | NO  |
| 15:68663912  | T/C  | rs706766380 | DPP4    | ENSSSCT00000067722.1 | missense variant      | H771R   | deleterious                  | -    | NO  |
| 15:68663923  | G/T  | rs692548435 | DPP4    | ENSSSCT00000067722.1 | stop gained           | Y767*   | -                            | --   | NO  |
| 15:68673354  | A/G  | -           | DPP4    | -                    | missense variant      | Y749H   | tolerated                    | 0.70 | YES |
| 15:68676800  | G/A  | rs697343146 | DPP4    | ENSSSCT00000067722.1 | missense variant      | S704L   | deleterious                  | -    | YES |
| 15:68680521  | T/C  | rs81213853  | DPP4    | ENSSSCT00000067722.1 | missense variant      | S636G   | deleterious                  | -    | NO  |
| 15:68694798  | G/A  | rs704514617 | DPP4    | ENSSSCT00000067722.1 | splice region variant | A409V   | tolerated                    |      |     |
| 15:68696930  | T/C  | rs697267964 | DPP4    | ENSSSCT00000067722.1 | missense variant      | I383V   | deleterious                  | 0.04 | YES |
| 15:68704861  | G/A  | rs325595747 | DPP4    | ENSSSCT00000067722.1 | missense variant      | T340I   | tolerated                    | 0.16 | YES |
| 15:68706434  | G/T  | rs712862703 | DPP4    | ENSSSCT00000067722.1 | missense variant      | P301T   | deleterious                  | 0.01 | NO  |
| 15:68710385  | A/T  | rs706520405 | DPP4    | ENSSSCT00000067722.1 | missense variant      | N237K   | deleterious                  | 0.01 | NO  |
| 13:204877719 | A/-  | rs789572246 | TMPRSS2 | ENSSSCT00000041631.2 | frameshift variant    | P519X   | -                            | -    | YES |
| 13:204877721 | G/T  | rs789944785 | TMPRSS2 | ENSSSCT00000041631.2 | missense variant      | P519T   | -                            | -    | YES |
| 13:204877772 | A/T  | rs341813954 | TMPRSS2 | ENSSSCT00000041631.2 | missense variant      | C502S   | deleterious - low confidence | 0.04 | YES |
| 13:204877780 | A/G  | rs702135491 | TMPRSS2 | ENSSSCT00000041631.2 | missense variant      | L499P   | deleterious - low confidence | 0.03 | NO  |
| 13:204878494 | A/G  | rs697132526 | TMPRSS2 | ENSSSCT00000041631.2 | missense variant      | M400T   | tolerated                    | 0.58 |     |
| 13:204881040 | A/G  | rs690909053 | TMPRSS2 | ENSSSCT00000041631.2 | missense variant      | W379R   | deleterious                  | -    | NO  |
| 13:204881905 | A/C  | rs704726313 | TMPRSS2 | ENSSSCT00000041631.2 | missense variant      | L314W   | deleterious                  | -    | NO  |
| 13:204881920 | G/GC | -           | TMPRSS2 | -                    | frameshift variant    |         |                              | -    | YES |
| 13:204881920 | G/GC | -           | TMPRSS2 | -                    | splice region variant | A309G/X |                              |      |     |
| 13:204881920 | G/GT | -           | TMPRSS2 | -                    | frameshift variant    |         |                              | -    | YES |
| 13:204881920 | G/GT | -           | TMPRSS2 | -                    | splice region variant | A309G/X |                              |      |     |
| 13:204881921 | C/T  | rs337297302 | TMPRSS2 | ENSSSCT00000041631.2 | missense variant      | A309T   | tolerated                    | 0.06 | NO  |
| 13:204883347 | T/C  | rs699066732 | TMPRSS2 | ENSSSCT00000041631.2 | missense variant      | I258V   | deleterious                  | 0.02 | YES |
| 13:204887898 | G/T  | rs711589152 | TMPRSS2 | ENSSSCT00000041631.2 | missense variant      | S209R   | tolerated                    | 0.09 | NO  |
| 13:204887942 | A/T  | rs703753915 | TMPRSS2 | ENSSSCT00000041631.2 | missense variant      | F195I   | deleterious                  | 0.02 | YES |
| 13:204895495 | T/C  | rs337083256 | TMPRSS2 | ENSSSCT00000041631.2 | missense variant      | I97V    | tolerated                    | 1.00 | NO  |
| 13:204901994 | T/C  | rs793686550 | TMPRSS2 | ENSSSCT00000041631.2 | missense variant      | Q52R    | tolerated                    | 0.09 | NO  |

## References

- Afar, D.E., Vivanco, I., Hubert, R.S., *et al.* (2001) Catalytic cleavage of the androgen-regulated TMPRSS2 protease results in its secretion by prostate and prostate cancer epithelia. *Cancer Res.* 61, 1686-1692. <https://cancerres.aacrjournals.org/content/61/4/1686.long>.
- Benetti, E., Tita, R., Spiga, O., *et al.* (2020) ACE2 gene variants may underlie interindividual variability and susceptibility to COVID-19 in the Italian population. *Eur. J. Hum. Genet.* 1-13. <https://doi.org/10.1038/s41431-020-0691-z>.
- Cao, Y., Li, L., Feng, Z., *et al.* (2020) Comparative genetic analysis of the novel coronavirus (2019-nCoV/SARS-CoV-2) receptor ACE2 in different populations. *Cell Discov.* 6, 11. <https://doi.org/10.1038/s41421-020-0147-1>.
- Chen, R., Jiang, X., Sun, D., *et al.* (2009) Glycoproteomics analysis of human liver tissue by combination of multiple enzyme digestion and hydrazide chemistry. *J. Proteome Res.* 8, 651-661. <https://doi.org/10.1021/pr8008012>.
- Chen, R., Jiang, X., Sun, D., *et al.* (2009) Glycoproteomics analysis of human liver tissue by combination of multiple enzyme digestion and hydrazide chemistry. *J. Proteome Res.* 8, 651-661. <https://doi.org/10.1021/pr8008012>.
- Damas, J., Hughes, G.M., Keough, K.C., *et al.* (2020) Broad Host Range of SARS-CoV-2 Predicted by Comparative and Structural Analysis of ACE2 in Vertebrates. *bioRxiv*, <https://doi.org/10.1101/2020.04.16.045302>.
- de Wit, E., Feldmann, F., Horne, E., *et al.* (2017) Domestic pig unlikely reservoir for MERS-CoV. *Emerg. Infect. Dis.* 23, 985-988. <https://doi.org/10.3201/eid2306.170096>.
- Hiramatsu, H., Kyono, K., Higashiyama, Y., *et al.* (2003) The structure and function of human dipeptidyl peptidase IV, possessing a unique eight-bladed  $\beta$ -propeller fold. *Biochem. Biophys. Res. Commun.* 302, 849-854. [https://doi.org/10.1016/s0006-291x\(03\)00258-4](https://doi.org/10.1016/s0006-291x(03)00258-4).
- Hussain, M., Jabeen, N., Amanullah, A., Baig, A.A., Aziz, B., Shabbir, S., Raza, F. (2020) Structural Basis of SARS-CoV-2 Spike Protein Priming by TMPRSS2. *bioRxiv*. <https://doi.org/10.1101/2020.04.21.052639>.
- Kirby, M., Yu, D.M., O'connor, S., Gorrell, M.D. (2010) Inhibitor selectivity in the clinical application of dipeptidyl peptidase-4 inhibition. *Clin. Sci.* 118, 31-41. <https://doi.org/10.1042/CS20090047>.
- Kolb, A.F., Maile, J., Heister, A., Siddell, S.G. (1996) Characterization of functional domains in the human coronavirus HCV 229E receptor. *J. Gen. Virol.* 77, 2515-2521. <https://doi.org/10.1099/0022-1317-77-10-2515>.
- Kristiansen, T.Z., Bunkenborg, J., Gronborg, M., *et al.* (2004) A proteomic analysis of human bile. *Mol. Cell. Proteomics* 3, 715-728. <https://doi.org/10.1074/mcp.M400015-MCP200>.
- Lan, J., Ge, J., Yu, J., *et al.* (2020) Structure of the SARS-CoV-2 spike receptor-binding domain bound to the ACE2 receptor. *Nature* 581, 215-220. <https://doi.org/10.1038/s41586-020-2180-5>.
- Li, F., Li, W., Farzan, M., Harrison, S.C. (2005). Structure of SARS coronavirus spike receptor-binding domain complexed with receptor. *Science* 309, 1864-1868. <https://doi.org/10.1126/science.1116480>.
- Li, W., Zhang, C., Sui, J., *et al.* (2005). Receptor and viral determinants of SARS-coronavirus adaptation to human ACE2. *EMBO J.* 24, 1634-1643. <https://doi.org/10.1038/sj.emboj.7600640>.
- Li, Z., Tomlinson, A.C., Wong, A.H., *et al.* (2019) The human coronavirus HCoV-229E S-protein structure and receptor binding. *Elife* 8, e51230. <https://doi.org/10.7554/eLife.51230>.
- Luan, J., Jin, X., Lu, Y., Zhang, L. (2020) SARS-CoV-2 spike protein favors ACE2 from Bovidae and Cricetidae. *J. Med. Virol.*, <https://doi.org/10.1002/jmv.25817>.
- Meng, W., Brigance, R.P., Chao, H.J., *et al.* (2010) Discovery of 6-(Aminomethyl)-5-(2, 4-dichlorophenyl)-7-methylimidazo [1, 2-a] pyrimidine-2-carboxamides as Potent, Selective Dipeptidyl Peptidase-4 (DPP4) Inhibitors. *J. Med. Chem.* 53, 5620-5628. <https://doi.org/10.1021/jm100634a>.

- Rasmussen, H.B., Branner, S., Wiberg, F.C., Wagtmann, N. (2003) Crystal structure of human dipeptidyl peptidase IV/CD26 in complex with a substrate analog. *Nat. Struct. Biol.* 10, 19-25. <https://doi.org/10.1038/nsb882>.
- Shang, J., Ye, G., Shi, K., *et al.* (2020) Structural basis of receptor recognition by SARS-CoV-2. *Nature* 581, 221-224. <https://doi.org/10.1038/s41586-020-2179-y>.
- Sun, J., He, W.T., Wang, L., *et al.* (2020) COVID-19: epidemiology, evolution, and cross-disciplinary perspectives. *Trends Mol. Med.* 26, 483-495. <https://doi.org/10.1016/j.molmed.2020.02.008>
- Thoma, R., Löffler, B., Stihle, M., Huber, W., Ruf, A., Hennig, M. (2003) Structural basis of proline-specific exopeptidase activity as observed in human dipeptidyl peptidase-IV. *Structure* 11, 947-959. [https://doi.org/10.1016/s0969-2126\(03\)00160-6](https://doi.org/10.1016/s0969-2126(03)00160-6).
- Towler, P., Staker, B., Prasad, S.G., *et al.* (2004) ACE2 X-ray structures reveal a large hinge-bending motion important for inhibitor binding and catalysis. *J. Biol. Chem.* 279, 17996-18007. <https://doi.org/10.1074/jbc.M311191200>.
- Wang, N., Shi, X., Jiang, L., *et al.* (2013) Structure of MERS-CoV spike receptor-binding domain complexed with human receptor DPP4. *Cell Res.* 23, 986-993. <https://doi.org/10.1038/cr.2013.92>.
- Wentworth, D.E., Holmes, K.V. (2001) Molecular determinants of species specificity in the coronavirus receptor aminopeptidase N (CD13): influence of N-linked glycosylation. *J. Virol.* 75, 9741-9752. <https://doi.org/10.1128/JVI.75.20.9741-9752.2001>.
- Wong, A.H., Zhou, D., Rini, J.M. (2012) The X-ray crystal structure of human aminopeptidase N reveals a novel dimer and the basis for peptide processing. *J. Biol. Chem.* 287, 36804-36813. <https://doi.org/10.1074/jbc.M112.398842>.
